# Supplementary material
Source: Springer Nature journal article supplement (https://www.springermedizin.de/resource/supplementary/12962_2014_200_MOESM3_ESM.docx/9571902)
Supplement: MOESM3 [file 9571902]

Table 1. Sample size per disease and measurement moment

| Disease | DMPs | Baseline | Follow-up | Baseline & follow-up |
| --- | --- | --- | --- | --- |
| Total | 16 | 2,438 | 1,974 | 1,322 |
| CVR | 9 | 1,342 | 1,125 | 725 |
| COPD | 4 | 689 | 596 | 395 |
| DMII | 3 | 407 | 253 | 202 |
